# Supplementary material for: Psychological adjustment of Spanish adolescents and their parents during COVID-19 lockdown: A mixed method approach
Source: PLoS One. 2021 Jul 29;16(7):e0255149. doi: 10.1371/journal.pone.0255149 (PMC8321118; doi:10.1371/journal.pone.0255149)
Supplement: S1 Dataset — (XLSX) [file pone.0255149.s001.xlsx]

## Sheet: Adolescents
AGE	GENDER	GRADE	COUNTRY	REGION	Tell us how are you dealing with not leaving home	What is helping you to deal better with the lockdown	What is the worst thing about confinement?
13	2	3	1	1	Fairly good	Being with my family and interacting with other people even through video calls.	I am comfortable because I can see my friends through video calls
11	1	1	1	2	On the one hand well, there is no need to go to school, on the other hand bad, I get very bored	Be with the family and be healthy	Not being able to see friends and family
16	1	6	1	2	Better than I expected, but little by little, every day it gets more uphill. I miss my friends and training, but I understand that this is a health emergency that involves all of us, and I can't think selfishly right now.	My friends, who I keep in touch with every day and they make everything happen a little bit faster. I am also lucky to have a dog and I can take him out to the street, which relieves me a bit of all that burden of spending all day in front of the computer giving classes.	Not being able to train or see my friends.
13	2	3	1	2	Well I miss hanging out with my family and seeing my friends	Things to entertain me that I did not do before and talk with my friends	Not seeing the people you love
13	2	2	1	2	I don't like it because I usually go out, but I'm getting used to it	The games	Not being able to see your loved ones and your friends, and that at home I get bored
15	1	4	1	3	Generally fine, a little fed up the truth	Well ns, my family	Well, basically not being able to see friends and family
14	2	4	1	2	No more but sometimes it makes me want to go out and see my friends.	Call my friends.	Not having a fixed routine and not being able to walk freely.
19	2	6	1	1	Without further ado, I just miss seeing my closest circle	Hobbies and video calls	Not being able to see my partner
	2	5	1	1	In the afternoons I get a little bored since in the mornings I do my homework, if I don't finish it I continue in the afternoon, then I watch a movie with my parents	Television and mobile	Not being able to see my classmates and friends
	2	4	1	1	The truth is that it is not the question of not going out that I take it well, the thing is that being at home and that they are sending you homework and more homework because it is difficult for me to be calm the truth.	My friends, talk to them.	Not seeing my friends and being able to meet them.
16	1	4	1	1	Fairly good	The play	Not seeing your friends
14	2	4	1	1	It's pretty boring, but I do things to understand myself.	Video calls with my friends, drawing, watching Netflix or playing video games, why do they give me a diaper?	The burden of always being locked up
14	2	4	1	1	It is boring not being able to leave the house and I miss my friends and family who do not live with me, but we have found things to have fun at home. I also like to go out to clap and see all the neighbors.	Do things so as not to get bored, video calls with my friends, I watch Netflix and YouTube, I play board games and video games, I play the guitar ...	That I can't go out for a walk with my friends or to shop, and all my trips have been canceled.
15	1	5	1	1	Pretty good truth	I guess being able to stay home and make calls with my friends isn't so bad	The food xd
14	2	4	1	4	I honestly think I'm doing quite well. I spend most of my time studying, and that way I entertain myself during the day, although it is true that sometimes it is difficult for me not to have any contact with the outside world. Being home for so many days is hard, but you have to be positive and think that we will soon be able to return to normality.	Be entertained at all hours. When I'm not studying or doing virtual classes, I talk with my friends or watch movies and series. I think it is a good way to cope: not lamenting that we have to be locked up at home without being able to leave, but concentrating on positive and beneficial things that we like to do.	Not being able to see my family or friends.
14	2	4	1	1	I can survive, but I miss going outside and doing fun activities	Netflix, and be able to make video calls with my friends to keep in touch with them	That you spend the whole day doing nothing, "trapped" behind four walls
15	1	5	1	5	Well the truth, I like to stay at home	Nothing	Not being able to meet my friends and not being able to go to high school
11	1	1	1	1	A little good and a little bad.	Watching movies and playing games with my family.	Not being able to see friends.
11	2	1	1	1	Bad because I need to get out of the house and hang out with my friends. Also a bit bored and tired	Well, cooking, TV, mobile, games with my family ...	Not being able to see anyone in person
12	2	1	1	1	Wrong!!!	The mobile	Bored me
12	2	1	1	1	Well now a little bad because I can't see my friends or my family and I'm tired of being locked up at home	board games, talking with my friends, watching movies and series ...	not see my family or my friends
11	1	1	1	1	Good, but I get quite bored and also overwhelmed by not leaving the house.	The company of my family and my pet and playing on the computer with my friends	Not being able to see my friends and family
18	2	6	1	1	Well within what fits	Distract me	Not being able to see anyone or lead a normal life
	1	5	1	1	I'm not having a very bad time to say, I am a home boy and although sometimes I went out, now they have taken that option away from me. I miss going out and seeing my friends even though this situation has not affected me much.	Especially technology: video games, movies, etc ... I'm also reading a comic and a book. I have a hobby to draw, but I don't know because in my quarantine I didn't really want to do it. Lastly, I exercise, I don't have weights, a stationary bike ... but I manage with some YouTube videos and an app.	Not being able to see your friends physically.
	1	5	1	1	Well, busy with many things	The computer	Not being able to eat there
16	1	5	1	1	I get quite bored, but I don't have it bad at all	Use the mobile, the computer and that they send me a lot of homework.	Not being able to go to the park to play soccer or get outdoors.
	1	5	1	1	Well the truth is that well, sometimes this tires a lot but then you think that we do it to save lives and at least I am calmer.	Doing things that you don't do in your routine, such as playing a bit of ping-pong with my father, playing with my dog, etc. Things that you don't normally do	That you are not with your loved ones, that you do not see your friends, you cannot meet anyone, I want to go back to school and see the teachers and I am realizing that you have to know who is important to you or does not benefit for your confidence.
	2	5	1	1	I try to take it well but at the end of the days I collapse and explode by myself in my room	tobacco, music and video calls	not being able to see my friends, we are 7 in a small house, not being able to have a little privacy and freedom
15	2	5	1	1	Pretty bad since before I used to hang out with my friends a lot and now I can't see them	Exercise, series, puzzles, movies ... Anything that keeps your mind busy	Not being able to clear your mind and have a good time with your friends
15	2	5	1	1	It's not bad for me, but I get stressed because it's not that I don't go out of my own free will, it's that they force me not to go out and I feel locked in.	Being able to watch series, even do my homework, put on makeup, spend time with my parents the hours they don't work, my dog ​​...	Not being able to stay
15	2	5	1	1	When I talk to people, everyone complains: -well shut up at home here, I want to see my friends ... This is already the third week, and I'm not getting along as well as the previous two but the truth is that I'm not I can complain, the weeks fly by	Spending time with family, having a schedule and disconnecting from TV / information	Not seeing the people I love, or playing basketball or leading a normal life
15	2	4	1	1	Well not too bad, but it overwhelms me not being able to go out	I don't know, the memes	It suffocates you and you want to go out the window
	2	4	1	1	Great, I take advantage of the time I have to get ahead with my studies, spend more time with my family and rest more.	My family.	Nothing.
14	1	4	1	1	Mainly I'm doing quite well, I still don't mind shutting myself up at home.	The organization is being key, the studies and the console are what best are helping me pass the time.	Well, basically not being able to see friends and family
	2	4	1	1	Haber, I personally take it badly but because I am a person that I do not like to be at home and that I am always there with my friends having a great time and well now I make video calls with them but it is not the same	That on Netflix they are putting out many series and then I can't stop watching them	Not being able to see my friends and not being able to hug them and have as much fun as before
	2	4	1	1	A little stressed	Watch Netflix, play games, make video calls, go out on the terrace ...	Not being able to see my friends and family
14	1	4	1	1	I am overwhelmed by all the teacher's homework, but overall I'm fine. I play online with my friends.	Play online with my friends.	Not being able to see my friends or the rest of the people I care about.
14	2	4	1	1	Well	Do the exercises that the Institute sends me	Not being able to walk more than I can walk at home, in other words, not being able to move as much as before
14	2	4	1	1	Good because I'm not dating, but I miss my friends	Internet	Not being able to buy things
14	2	4	1	1	You get used to it	My family	Not seeing my friends, family and Mario
14	2	4	1	1	Well, for now I am not overwhelmed much inside the house	My friends and family	Not being able to swim
14	1	4	1	1	I do not take it bad	The videogames	The friends
14	2	4	1	1	I don't like being locked up with my family, I miss my friends and my boyfriend, and I need to get out	Talk to my friends	Not being able to see my friends
14	1	3	1	1	I am doing very well, I do my school work in the morning and in the afternoon I use the computer	The support of the whole family	Not seeing friends
	2	3	1	1	Well	Watch Netflix and re-decorate my room.	That I can't see my friends
14	1	3	1	1	Well. I'm doing well for the moment. It's not a super cool situation but I do a lot of things and I get along very well.	My family. The activities we do together.	Not being with my friends.
13	1	3	1	1	Well, no problem	the power to rest	not being able to walk
13	1	3	1	1	Bad because it's overwhelming	Being able to watch series or movies and play video games	Not being able to go out and meet my friends
13	1	3	1	1	At first it was the least important thing to me, but right now I feel a bit overwhelmed at times. Besides that I miss a lot of people.	My family, movies, writing, reading, being able to talk with my friends.	Not being able to see the people with whom you communicate every day, in addition to that it is important to have fresh air and that you get the sun from time to time, in addition to losing the rhythm in all the activities of the day to day.
13	1	3	1	1	I like it because you don't have to get up early or go to school and I can play play every day	Culinary activities, playstation, boxing and movies	I can't play soccer or be with my friends
13	1	2	1	1	Well	Play console	That I get bored
12	1	2	1	1	I'm doing very well since I can organize myself	Do your homework and play sports	Not being able to train swimming.
12	2	2	1	1	Well, bad	Nothing	Do not see your friends or go out to eat for there or whatever.
	1	2	1	1	More or less, especially the issue of going out to play sports or being able to see my friends	Hang out with my family	That you can't see your friends
12	2	2	1	1	I am carrying it a little overwhelmed because I cannot see my grandparents and I have many duties. I am also afraid because my mother is a pharmacist and is exposed to danger.	My family	get bored
12	2	2	1	1	A little boring but pretty good	Follow a routine without leaving home and my mother	Not being able to go to the Institute. Do not do extracurricular activities and that my mother cannot buy when she wants1
12	2	2	1	1	Well, sometimes I want to go out and I do my best not to get bored but I don't have it all badly.	Playing games with the computer, I like to clap my hands, and since I don't have a cell phone, send me gmails with my friends.	Virtual classes.
12	2	2	1	1	A little overwhelmed and wanting to see my grandparents	My family and friends	Not seeing my family or friends
12	1	2	1	1	Well it overwhelmed me a little but quite well	My brothers	Not being able to see my relatives
13	1	2	1	1	The truth is, I'm doing quite well, but I'm angry that I can't play basketball.	La play and my family	Not being able to play basketball and not seeing what my friends

## Sheet: Parents
AGE	GENDER	COUNTRY	REGION	EDUCATION	Tell us how are you dealing with not leaving home	What is helping you to deal better with the lockdown	What is the worst thing about confinement?
46	2	1	1	3	By working in person in Social Services and being very active, I am doing well. The age of my children, despite some very specific overflow, makes it easier. The worst, not seeing my elders.	My partner takes care of my daughter and my son. The survey did not offer the possibility of marking their employment status: the educational kitchen staff do not work but receive their salary. Have a family schedule, play sports, take care of my elders through calls and send them videos, watch good movies and series, read, that my children have extracurricular activities online and homework, coo…	I go.
45	2	1	5	3	very well	Be in good health, be with my family and be able to work online	Not seeing the rest of the family
47	1	1	2	3	It depends on the day, usually wrong. Accepting that you cannot be constantly producing and reconciling with the idea.	Keep me busy	Feeling isolated, with poor communication, the unpleasant feeling of being part of a repression or dictatorship, intimate contact ...
51	2	1	2	3	It is difficult to combine work, housework, children, news, parents alone at home ... but there are other opportunities to spend time together as a family	Discipline and routine. Avoid silly conflicts with your children and your partner ... relativize the little things that intense coexistence has	Walking and doing sports. Be with others, share
41	2	1	1	3	Regular, roller coaster sometimes good and sometimes a little bad	Reading, being with my children, sports, work, friends	Freedom of movement, doing sports, having a drink outside the home ...
44	2	1	1	3	As a family, we had spent a confinement for almost a month in Venezuela, in 2014 due to the protests and the anarchy that reigned, the schools were also closed, so it is the second time that we stayed at home for some time and that obviously It has helped us not to despair, to understand that no matter how difficult the situation may seem, we will get out of this and rather we seek to do family a…	Organization at home, without going to the extreme, is essential, establishing schedules for school activities, as well as for leisure, but without being too strict.	Not seeing people, not being able to walk freely, feeling isolated.
41	2	1	6	3	The truth is that I do not take it badly. I enjoy my children more and spend more time with them, which because of my job I did not.	To be with them, and to have a patio to which I go out.	Not being able to be with my parents, grandparents. Go out whenever you want to buy something or just go for a walk.
48	2	1	4	3	Well. I work at home and study, so there is not much difference from a normal winter except for the subway trips that I do not miss. As for contact with loved ones, I make up for it with video calls and since I am aware that it is temporary, it does not overwhelm me. I take it normally. Maybe it would be worse in summer, when we do go out and get together more.	The technology that allows me to be in contact with my daughter and my other loved ones, and to have my partner at home.	Not being able to enjoy nature or walks around the city in the company of my partner or my family and friends.
47	2	1	5	3	A very strange situation since I am a very sociable person and I like to be surrounded by friends.	Doing tasks that I did not do before such as: scrubbing, tidying up, cleaning windows, cooking, reading ...	Not being able to go to work since I am a teacher.
47	2	1	1	3	These first 15 days psyched up, the rest I think will cost more	Be with my children	Not seeing dear people, mother brothers, friends ...
47	2	1	1	3	No problem for me, I have been telecommuting for 5 years and my routine hasn't changed much. The girls are at home and the online classes are an over-effort to organize and work commitment, but the atmosphere is calm most of the time. The greatest concern is for the grandparents, who are in Valencia, and we cannot help them as we would like.	The house is large and we can have space when someone needs to be alone. Trying to carry out a routine of work and rest with leisure helps us to organize ourselves. Eating on the terrace when the sun is out (not a bit lately) also helps. Make girls aware so that they understand the reason for this change?	Not being able to take walks and socialize with other groups (complementary activities)
44	2	1	1	3	Better than I expected, although I would love to take a walk on the beach and another one up the mountain	Plan the days with schedules	Not being able to be with other family and friends, having to think about lunch and dinner for everyone
46	2	1	1	3	Good for the moment, concerned about the elderly in my environment and my family and the balance at home.	Know that we are protected and doing the right thing, and that there is a solution	Physical mobility and contact with my people
58	2	1	1	3	Well, playing children. Going to work and coming home	Reading, movies, family games	Do not wander
54	1	1	1	3	I'm doing very well, much better than I expected.	The fact that both my partner and my children are coping with the situation without any apparent problem. Understanding the risks helps to understand that maintaining behavior in accordance with the recommendations of the health authority is the most reasonable thing to do at this time.	Lack of social life.
42	2	1	1	3	Worried about my children. I go out to work but they don't. Concerned about my mother who is 82 years old and lives alone and now she is very lonely and depressed. Worried about the situation because I don't know when this will end	My children who are champions and my husband. The work also helps because I have a lot of work	Not seeing my mother and my friends
49	2	1	1	3	WELL	MY WORK AND MY WAY OF BEING	NOT BEING ABLE TO DO NORMAL THINGS, WALKING, BIKE
43	2	1	1	3	I get along well because I have to go to work so it doesn't get so heavy	The job in quotes	For my kids
36	2	1	1	3	well, we have organized a schedule where we include exercise routines and education.	gymnastics and my business being virtual.	enjoy the beautiful sunny days
45	2	1	1	3	Well. I am a teacher and I have a lot of work. I don't have much time to think about the situation	Work and my family	Go out for a walk in the countryside
54	1	1	1	3	It is not the ideal situation but the coexistence is good.	The company of my children and the contact with my students and colleagues by telematic means.	The loss of human contact.
47	2	1	1	3	The situation at home is pleasant and the hours pass quickly because I occupy them in a thousand and one activity alone and in company. However, the mood is low when I come in contact with the pain of people who are infected, who have infected or deceased people, workers ... it causes me a lot of pain, helplessness and defenselessness.	Doing activities, being busy, maintaining routines, looking for something positive every day, the company of my family and obviously not having any sick person.	I am short of breath, I miss walking around the city and being blown by the wind, seeing the streets with their normality ... I was walking a lot and now I can't do it. And in the abstract, the worst thing is the awareness of the loss of freedom.
41	2	1	1	3	It is not making me emotionally heavy because I try to occupy my time as much as possible but I do lack mobility, physically I have it worse	My son's company, and access to new communication technologies.	Physically I notice a lot not being able to go out for a walk, for example or decide on my movements. As well as not being able to see my family
53	2	1	1	3	VERY WELL, QUIET, DONE HOUSEHOLD AND LEISURE WORK COLLABORATING WITH MY DAUGHTER'S TASKS AND HELPING HER WHAT I CAN AND WALKED THE DOG, ONLY TWICE A DAY, TRYING TO GO OUT TO BUY AS LESS AS POSSIBLE.	THINKING THAT THERE IS NO OTHER THAN TO HELP NOT GET INFLUENCED OR SPREAD AND THINK A LOT OF OUR ELDERLY AND PEOPLE WITH IMMUNE PROBLEMS.	NOT GOING TO DO MY WORK AND WEEKEND REST
44	2	1	1	3	I'm fine because I'm very homey	Doing chores at home I do 1 hour of exercise I watch TV series I crochet I go to social networks	Not being able to see friends and family Not being able to go shopping not being able to go out for a walk Not having a free life
44	2	1	1	3	I'm fine because I'm very homey	I do sports I watch TV I go into social networks I crochet I clean thoroughly at home	Lack of freedom
50	2	1	1	3	Very well, I take the opportunity to do pending tasks at home.	Keep schedules like before.	Not being able to do many things or relate to each other.
47	2	1	1	3	Regular, on the one hand I feel lucky because I do not lack anything physical and my family is fine, on the other hand I have a lot of anxiety having to go shopping and not find what I need not being able to go for a walk that clears me up a lot and the worst not knowing how long this is going to last.	Follow some routines and talk with my partner.	Not being able to be with the people I love
39	2	1	1	3	Leaving home is not bad for me because we have comforts and the situation requires it. I honestly don't want to leave the house, maybe fear makes me feel like this.	Follow routines and introduce activities that we did outside such as gymnastics, music or follow classes online. Talk every day with the family.	Not seeing my family and the anxiety and fear that it causes me to see what is happening outside and to think if we can see ourselves in that situation of illness, loneliness and without knowing what is going to happen.
47	2	1	1	3	Well, I feel accompanied and in good health. When I work I also feel useful	To work. Keep a daily routine. Rest a lot. Communicate with my mother daily	Little sociability and physical contact with friends, family Little mobility (I need to walk)
36	2	1	1	3	Good, working, taking the pet out and enjoying my daughters.	Work and play with my daughters	Not seeing my relatives as parents and brother.
47	2	1	1	3	Sometimes. I can change scenarios at home, but I sleep poorly due to lack of activity I want to return to a normal routine	Home entertainment. Manual tasks. To be with my family	Every day is very similar. I think it lowers my self esteem
49	2	1	1	3	Reasonably well, for now	Try to find moments of joy and distraction from the situation	The overload that it supposes us at home, where we have to do work, support our children, especially in distance classes and work at home (meals, cleaning, etc.)
47	2	1	1	3	Good because I'm going to work	Go out to work	Not doing sports
50	2	1	1	3	Better than I thought at first. Teleworking takes me a lot of time. I just go out to do the shopping. It distresses me that I cannot visit my parents, who are at great risk.	Collective activities (applause, dancing with neighbors ...), teleworking and digital tools to connect with friends or family.	Not being able to be outdoors.
48	2	1	1	3	I take it well	I am a landlady and I live in a house with a garden	Contact with people
43	2	1	1	3	Bad, I work in the social health sector, I have to work compulsorily and I have to leave my daughters alone	Come home and everything is fine	My daughters are non-stop and begin to notice the confinement
50	2	1	1	3	Well, with anguish for what may come. afraid that someone in my family will be contaminated. teleworking is difficult for me due to lack of resources (printer for example), very concerned about the virus and the economic future of the country	She is at home with my daughter, to see her how with the support of the teachers she stops her day she is busy with homework	not seeing my mother, not having a social life
46	2	1	1	3	Overall good. There are five of us at home and we can live things together that during the daily stress of schedules and activities we cannot do. The bad moments are my migraines and the saturation of homework that I supervise above all. In Valencia the weather is bad for many days, the lack of sun has made it bad. Stress from the situation at work. I am a dentist and we have decided to close due…	Have time to exercise, do online training in my profession, go out to a small balcony. Communicate with relatives, calls, video calls ... Know that all my relatives are fine. Lower trash. The time shared with my children.	Not seeing my parents. To my little niece who is one year old. Have the feeling of clearing myself.
48	2	1	1	3	Personally well. I don't usually enjoy my home due to overwork and activities. A little worried about the grandparents, but they are fine. In the collective bad. Concerned about the health and economic situation to come.	My children. They are being great. And we can all enjoy ourselves more, which is not possible on a day-to-day basis.	Not being able to go to see the grandparents to give them a hug. And not being able to go to the gym
51	1	1	1	3	Actually I do go out, to work and take the dog out. More than enough not to consider myself locked up during this period.	The fact of continuing to work.	Fall into monotony.
55	1	1	1	3	With resignation	Be working telematically	Be with the rest of family and friends
53	2	1	1	3	Good at times, while I am active, working or doing gymnastics. When I think about it, I feel sad and worried about the health of my family and friends.	To be with my children	Lack of exercise and not being able to sunbathe, interact with my friends, family and co-workers.
43	2	1	1	3	I'm doing well. But it is very difficult to reconcile telework, tele-duties of two children, the management of their free time, order and cleaning at home, shopping and cooking, etc.	My parents live next door. It is the grandmother who takes care of the kitchen.	Free time management.
46	2	1	1	3	very well	Rethink my life again	Not being able to hug my own or being able to walk in the field or on the beach
41	2	1	1	3	I get along I miss family friends and going out in the field	Spending time with my husband and children, doing housework, cooking	Not seeing my mother brothers-in-law mother-in-law
45	2	1	1	3	We take it in a positive way with the perspective that it is a difficult but temporary stretch and filling the confinement with conscience and responsibility that is a fair responsibility and obligation, we will all benefit. At home we keep trying to keep the schedules so as not to lose the usual rhythm even though it is a bit difficult. Now we are more united and we do more things in common such…	The family union that we have.	Nothing ... there is always something to do at home.
16	2	1	3	2	Well. I don't usually go out a lot so I'm not stressed. I like to be at home.	Music.	Not being able to walk my dogs.
47	2	1	2	2	Well at first resignation, trying to see the positive side of the situation and I do not take it bad at all but there are days that it costs more to maintain it is a high vibrational state. I am told that 15 days before I started to move my divorce and here we are all living with this added situation	My attitude towards life, my children, music, friends and the ease of encounters with the RRSS, Yoga and meditation.	Not being able to vent at certain times and my usual freedom to do, undo without having to explain.
35	2	1	1	2	for now not so bad, since I do many tasks throughout the day, homework, cooking, cleaning, ordering things ... etc ...	what helps me is my passion for cooking, where these days I am preparing new recipes.	not being able to vent, cry, scream, flee, run ...
14	2	1	1	2	At first fine, I am quite positive, but I am not able to make my daughter have routines and our relationship is tense which makes me feel sad	Nothing	Feeling that your freedom has been taken away
47	2	1	1	2	I am doing quite well, we have put some routines at home and the coexistence is very cool	My family	See the rest of the family and work
49	2	1	1	2	Okay, but sometimes it overwhelms me	Read, watch TV, cook	Not being able to see my family
48	2	1	1	2	I try to organize time and keep busy	My family	See my friends my brothers and mother
51	2	1	1	2	At times, well and at times, bad	My inner strength although for some circumstances they give me down	That my mind does not oxygenate and I cannot tell someone else my fears about my problems.
47	1	1	1	2	Currently we have been 13 days and so far we are doing well. We have been shopping 2 times.	The group dynamics that we have designed with the tasks assigned to each one, and for me in particular I have taken it as a rehearsal of a space trip to Mars.	Not being able to go to see family / friends, not being able to play sports or go for a walk in the mountains / beach
51	2	1	1	2	I handle it well. I am clear that it is the best I can do for myself and for others. It's something temporary.	To think that this has an end See that other countries are already being	Socialize with others Go for a walk in the fresh air
48	2	1	1	2	Inside the bad ... I am calm. I have assumed it although I long to walk with the air in my face.	Knowing that it is necessary and it is for the good of my family and mine	Not being able to walk down the street and see the rest of my family
39	2	1	1	2	In principle I do well since I consider myself a very home-grown person. I kill time by taking some courses that I have pending.	WhatsApp groups	That the sun does not shine on my face, go for a walk
51	2	1	1	2	Well more or less, but bad	Internet	Not being able to interact with everyone in person
45	2	1	1	2	At first with stress, and later adjusting, spending time with the children, and the nephew. Living things that we couldn't before due to lack of time.	Patience.	Fear and feeling that everything is paralyzed.
51	2	1	1	2	I handle it quite well. I like to be at home. I can't usually be at home, so now I'm enjoying myself.	Be with my daughters	Not enjoying friends
46	2	1	1	2	For not going out I do not take it badly, at first the bad thing was for not working and having to put my workers in ERTE	Exercising, reading, cleaning, sometimes organizing things at work and making video calls	Not being able to work, not being with family and friends
43	2	1	1	2	Well at the moment agoviada	I dedicate myself to doing things around the house	Not enjoying nature
37	2	1	1	2	I miss my routine	Go out to work	Sedentary lifestyle
41	2	1	1	2	We do not take it bad, because I go to work and the girls are entertained	Do things together	Not being able to see family
41	2	1	1	2	Well we have organized the spaces quite well, lucky to have a town house with several floors	Talk a lot with the family nucleus and contact with family and friends by whassap and telephone	Not interacting with the people I love and not doing outdoor activities
46	2	1	1	2	Wrong. Not because of the fact of not being able to leave the house, but because of all that it entails (change in work habits, personal ...).	Read and do some exercise doing some of the tables that they do on TV	Not having conversations with friends s / Compañ er @ s
50	2	1	1	2	very overwhelmed	my daughter	claustrophobic situation
47	2	1	1	2	Well, since the three of us in the family are working and studying, it doesn't get too long, we share a few hours and we have set schedules, practically the usual ones. I really miss being able to just go outside, sunbathe and see my parents, family and friends.	Be all active and working	The feeling of lack of air. Only the days that I go down to buy or throw away the garbage is like taking air.
57	2	1	1	2	With optimism and as a family, taking advantage of every day with them. Enjoying what for work reasons we could not enjoy.	My daughter, my husband, television, mobile.	I go out to work in the mornings.
42	2	1	1	2	Regular, I have increased the number of anxiolytics, there are days that are better and days that are worse	Being confined to a second home and being able to see the sea	Not being able to go for a drink with friends, go to my yoga classes.
43	2	1	1	2	That in particular is not bad for me, but if I go to work because of the stress that comes with working in this situation and also because I am going through the mourning for the loss of my mother 2 weeks ago.	Living in a house, being able to go out to take the sun or the air on the days that it has been possible.	Not doing sports outdoors.
48	2	1	2	1	It costs, but I take it well	Listen to the radio, read, and talk with the family	When the weather is good
40	2	1	2	1	The question with whom I live I do not ask anyone and has no choice. Not very well. I go out every day since I work at a supermarket and on top of that I'm alone on the way back because I decided for my family to leave in case I caught it, not to hit it on my children	Clean the house thoroughly. Draw. Talking on phone. Being entertained when I'm at home so as not to think.	Having to go out rather well
16	2	1	1	1	Quite bad, and if you go out to buy also bad because the city is dead.	Television, internet, radio, kitchen	Not being able to relate to mine, even though I maintain the relationship on the phone almost daily. Not being able to care for an 84-year-old aunt who is alone
40	2	1	7	1	I am used to being a housewife but being with my children 24 hours a day together they have tdh and I have depressive treatment	Nothing	Having 24 hours my children all day together the arguments are worse and more aggressive between them because of their nervous disorder
46	2	1	1	1	I have ups and downs of mood, but not everything is due to the virus I am in the situation that my husband left home in the middle of a pandemic For not loving me He prefers to be away from me	My son spends the day telling me that he loves me and giving me kisses	See people See your family Breathe fresh air
47	2	1	1	1	I am forced by my work, because I work in a supermarket. But I would like to be able to stay at home since my fear is to bring the virus since my son is at risk. But the rest of the day of course I do not go out.	The time I spend with my children.	Do not go out for a walk, do not see friends, family, etc. etc.
41	1	1	1	1	Wrong, I am a self-employed carrier and my main customer has stalled orders. And I have no trips.	Photography, videoconferences with friends from the photography club	That i can't work
14	2	1	1	1	Well	My daughter	Not having freedom of movement
